# Supplementary material for: Crumpled nitrogen-doped graphene–ultrafine Mn3O4 nanohybrids and their application in supercapacitors
Source: Royal Society of Chemistry journal article supplement (doi:10.1039/c3ta12554h), 2013-01-01
Supplement: c3ta12554h.pdf [file c3ta12554h.pdf]

**Electronic Supplementary Information (ESI) for**

**Crumpled nitrogen-doped graphene-ultrafine Mn<sub>3</sub>O<sub>4</sub>**

**nanohybrids and their application in supercapacitors**

*Shuhua Yang, Xuefeng Song\*, Peng Zhang, Lian Gao\**

*State Key Laboratory for Metallic Matrix Composite Materials,*

*School of Materials Science and Engineering,*

*Shanghai Jiao Tong University, Shanghai, 200240, China.*

*E-mail address: liangao@mail.sic.ac.cn (L. Gao); songxfeng@sjtu.edu.cn (X. Song)*

*Tel: +86-12-52412718. Fax: +86-21-52413122*

Electronic Supplementary Information (ESI) for J. Mater. Chem. A  
This journal is © The Royal Society of Chemistry 2013

**Table S1.** Electrochemical properties of various  $\text{Mn}_3\text{O}_4$  and  $\text{Mn}_3\text{O}_4$  based composite materials explored in aqueous electrolytes.

| Material                                      | Electrolyte                                             | Measurement system | $C_m$ (F/g) | Method                     | Cycle life   | Ref.       |
|-----------------------------------------------|---------------------------------------------------------|--------------------|-------------|----------------------------|--------------|------------|
| spinel $\text{Mn}_3\text{O}_4$                | 0.2 M $\text{Na}_2\text{SO}_4$                          | three-electrode    | 133.1       | CV<br>50 mV /s             | 1000         | 1          |
| $\text{Mn}_3\text{O}_4$ hollow-tetrahedra     | 2.0 M KCl                                               | three-electrode    | 148         | CV<br>5 mV /s              | 400          | 2          |
| ball-milled graphite/ $\text{Mn}_3\text{O}_4$ | 1M $\text{Na}_2\text{SO}_4$                             | two-electrode      | 62          | CD<br>1 mA / $\text{cm}^2$ | 8000         | 3          |
| aMCMB/ $\text{Mn}_3\text{O}_4$                | 1.0 M $\text{LiPF}_6$                                   | capacitor cells    | 178         | CD<br>330mA/g              | Not reported | 4          |
| $\text{Mn}_3\text{O}_4$ /RGO                  | 0.5 M $\text{Na}_2\text{SO}_4$<br>5 mM $\text{NaHCO}_3$ | three-electrode    | 193         | CV<br>25 mV /s             | Not reported | 5          |
| Graphene/ $\text{Mn}_3\text{O}_4$             | 1 M $\text{Na}_2\text{SO}_4$                            | three-electrode    | 121         | CD<br>0.5 A/g              | 10000        | 6          |
| RGO(31.6%)/ $\text{Mn}_3\text{O}_4$           | 1 M $\text{Na}_2\text{SO}_4$                            | three-electrode    | 153         | CV<br>5 mV/s               | 1000         | 7          |
| $\text{Mn}_3\text{O}_4$ /graphene             | 1 M $\text{Na}_2\text{SO}_4$                            | three-electrode    | 230         | CD<br>1 A/g                | 1000         | 8          |
| CNGMNs                                        | 0.5 M $\text{Na}_2\text{SO}_4$<br>5 mM $\text{NaHCO}_3$ | three-electrode    | 254.5       | CD<br>1 A/g                | 2000         | This study |

CV = cyclic voltammetry; CD = galvanostatic charge-discharge; RGO= reduced graphene oxide.

According to this table, it can be obviously seen that the crumpled nitrogen-doped graphene-ultrafine  $\text{Mn}_3\text{O}_4$  nanohybrids (CNGMNs) electrode shows the highest specific capacitance under CD measurements.

**Table S2.** N 1s core level peak analyses of CNGMNs. Each peak corresponds to a specific type of nitrogen: N-1: pyridinic N, N-2: pyrrolic N, and N-3: quaternary N.

| N 1s           | N-1 [%]  | N-2 [%] | N-3 [%]  |
|----------------|----------|---------|----------|
| Binging energy | 398.4 eV | 400 eV  | 401.1 eV |
| Percentage     | 17.4     | 70.3    | 12.3     |

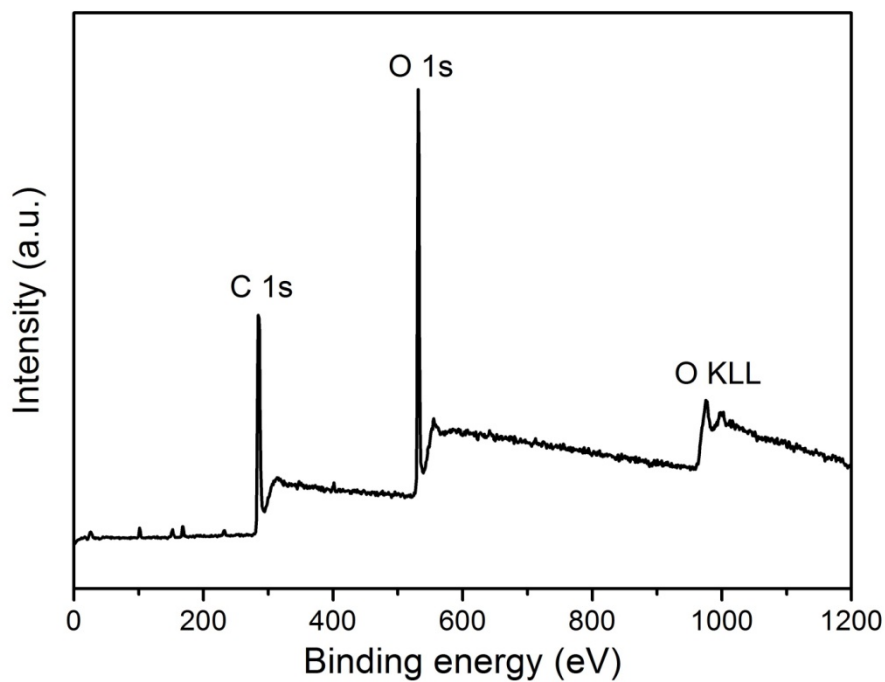

**Figure S1.** XPS survey spectra of GO prepared from natural flake graphite by a modification of Hummers method.

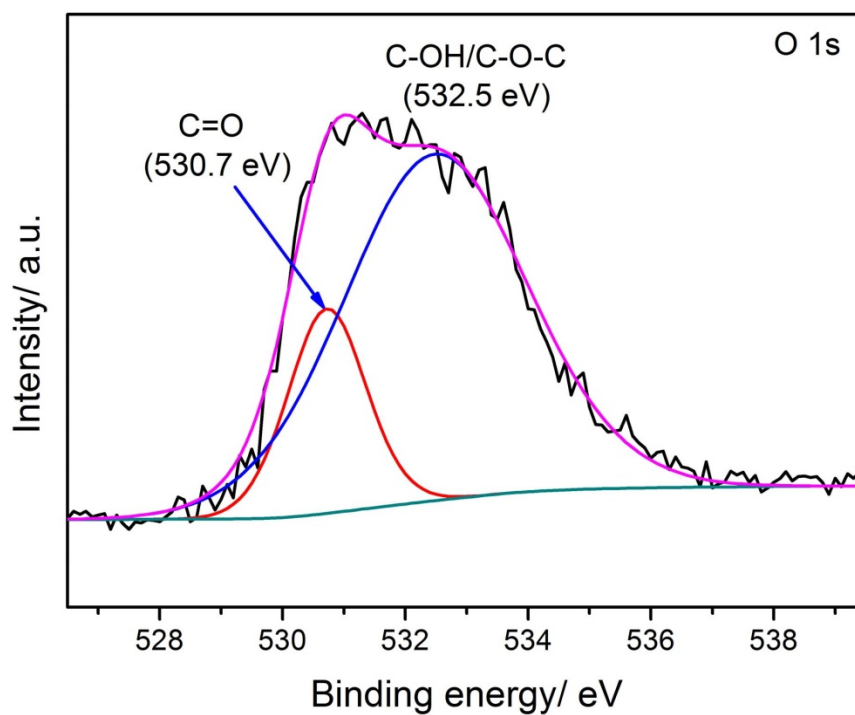

**Figure S2.** Narrow O 1s XPS spectra of the NG

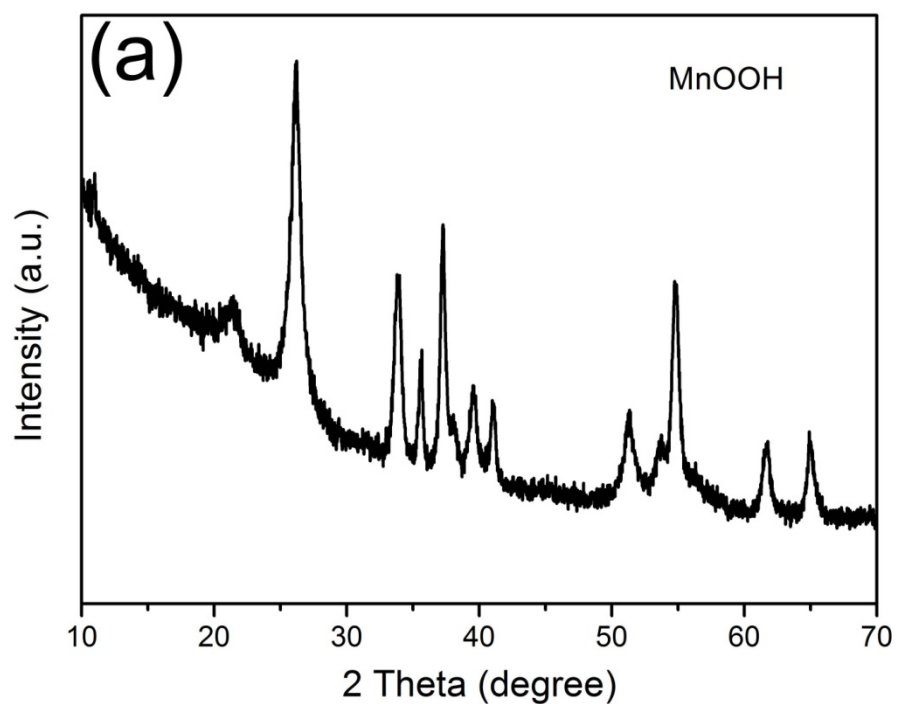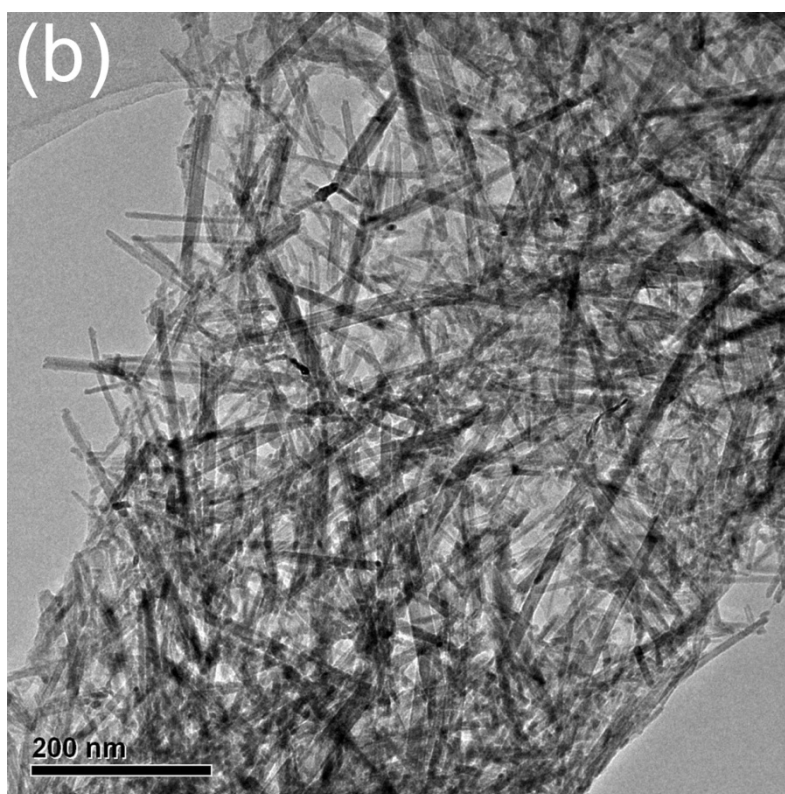

**Figure S3.** XRD pattern (a) and TEM image (b) of the sample prepared under the same experimental conditions in absence of aniline.

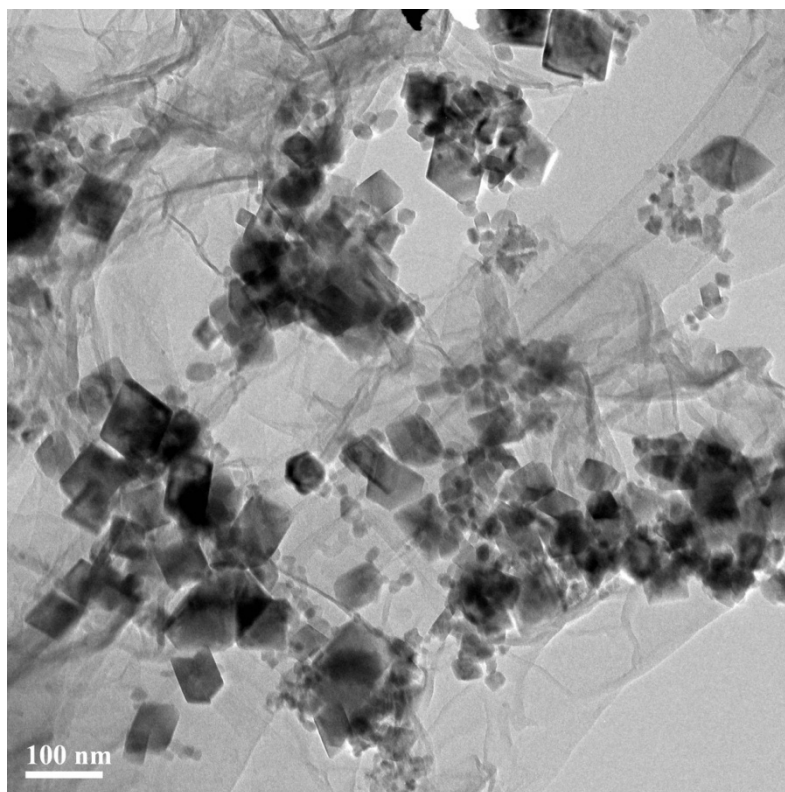

**Figure S4.** TEM image of the sample prepared under the same experimental conditions except for reaction time (12 h).

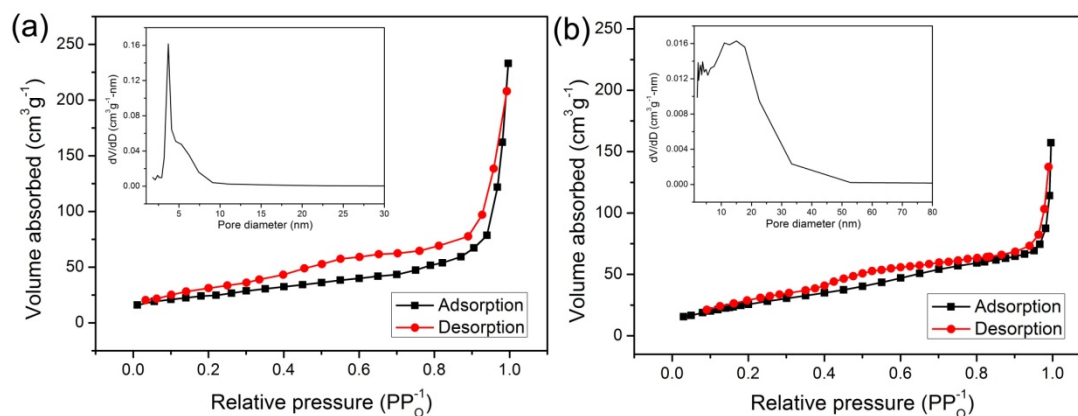

**Figure S5.** Nitrogen adsorption and desorption isotherm of CNGMNs (a) and rGO-Mn<sub>3</sub>O<sub>4</sub> (b). The inset shows corresponding pore size distributions of CNGMNs (a) and rGO-Mn<sub>3</sub>O<sub>4</sub> (b).

The specific surface areas of CNGMNs and rGO-Mn<sub>3</sub>O<sub>4</sub> are 189.73 m<sup>2</sup>•g<sup>-1</sup> and 126.54 m<sup>2</sup>•g<sup>-1</sup>, respectively. CNGMNs show a uniform pore size distribution in range of 3-8 nm, whereas rGO-Mn<sub>3</sub>O<sub>4</sub> presents irregular pore size distribution from 2 to 50 nm.

## References

1. Y. Dai, K. Wang and J. Xie, *Applied Physics Letters*, 2007, **90**, 104102-104104.
2. M. Fang, X. Tan, M. Liu, S. Kang, X. Hu and L. Zhang, *CrystEngComm*, 2011, **13**, 4915-4920.
3. J. Cao, Y. Wang, Y. Zhou, D. Jia, J. H. Ouyang and L. Guo, *Journal of Electroanalytical Chemistry*, 2012, **682**, 23-28.
4. H. Wang, Z. Li, J. Yang, Q. Li and X. Zhong, *Journal of Power Sources*, 2009, **194**, 1218-1221.
5. C. L. Liu, K. H. Chang, C. C. Hu and W. C. Wen, *Journal of Power Sources*, 2012, **217**, 184-192.
6. J. W. Lee, A. S. Hall, J.-D. Kim and T. E. Mallouk, *Chemistry of Materials*, 2012, **24**, 1158-1164.
7. L. Li, K. H. Seng, H. Liu, I. P. Nevirkovets and Z. Guo, *Electrochimica Acta*, 2013, **87**, 801-808.
8. Y. Wu, S. Liu, H. Wang, X. Wang, X. Zhang and G. Jin, *Electrochimica Acta*, 2013, **90**, 210-218.
